# Supplementary material for: PlasmidSeeker: identification of known plasmids from bacterial whole genome sequencing reads
Source: PeerJ. 2018 Apr 2;6:e4588. doi: 10.7717/peerj.4588 (PMC5885972; doi:10.7717/peerj.4588)
Supplement: Supplemental Information 1 [file peerj-06-4588-s001.xlsx]

## Sheet: Sheet1
Table S1. Full plasmid observed kmer threshold results in real data (k=20)
Sample name	F threshold (%)	Clusters	Cluster p-value signif.	TP	FP	TN	FN	Sens	Spec
Providencia stuartii	95	1	1	1	0	8513	0	1,00	1,00
Providencia stuartii	80	1	1	1	0	8513	0	1,00	1,00
Providencia stuartii	65	2	1	1	0	8513	0	1,00	1,00
Providencia stuartii	50	3	1	1	0	8513	0	1,00	1,00
Providencia stuartii	35	4	1	1	0	8513	0	1,00	1,00
Citrobacter freundii	95	2	2	2	0	8512	0	1,00	1,00
Citrobacter freundii	80	4	2	2	0	8512	0	1,00	1,00
Citrobacter freundii	65	9	9	2	7	8505	0	1,00	1,00
Citrobacter freundii	50	24	24	2	22	8490	0	1,00	1,00
Citrobacter freundii	35	45	45	2	43	8469	0	1,00	0,99
Corynebacterium callunae	95	2	2	2	0	8512	0	1,00	1,00
Corynebacterium callunae	80	2	2	2	0	8512	0	1,00	1,00
Corynebacterium callunae	65	2	2	2	0	8512	0	1,00	1,00
Corynebacterium callunae	50	2	2	2	0	8512	0	1,00	1,00
Corynebacterium callunae	35	2	2	2	0	8512	0	1,00	1,00
Burkholderia cenocepacia	95	0	0	0	0	8514	0	na	1,00
Burkholderia cenocepacia	80	0	0	0	0	8514	0	na	1,00
Burkholderia cenocepacia	65	0	0	0	0	8514	0	na	1,00
Burkholderia cenocepacia	50	0	0	0	0	8514	0	na	1,00
Burkholderia cenocepacia	35	0	0	0	0	8514	0	na	1,00
Pseudomonas aeruginosa	95	3	3	3	0	8511	0	1,00	1,00
Pseudomonas aeruginosa	80	3	3	3	0	8511	0	1,00	1,00
Pseudomonas aeruginosa	65	3	3	3	0	8511	0	1,00	1,00
Pseudomonas aeruginosa	50	4	4	3	1	8510	0	1,00	1,00
Pseudomonas aeruginosa	35	6	6	3	3	8508	0	1,00	1,00
Acinetobacter baumannii	95	1	1	1	0	8513	0	1,00	1,00
Acinetobacter baumannii	80	1	1	1	0	8513	0	1,00	1,00
Acinetobacter baumannii	65	1	1	1	0	8513	0	1,00	1,00
Acinetobacter baumannii	50	3	3	1	2	8511	0	1,00	1,00
Acinetobacter baumannii	35	11	10	1	10	8503	0	1,00	1,00
Escherichia coli	95	2	2	2	0	8512	0	1,00	1,00
Escherichia coli	80	2	2	2	0	8512	0	1,00	1,00
Escherichia coli	65	3	2	2	0	8512	0	1,00	1,00
Escherichia coli	50	7	4	2	2	8510	0	1,00	1,00
Escherichia coli	35	14	9	2	7	8505	0	1,00	1,00
Staphylococcus aureus	95	1	0	0	0	8514	0	na	1,00
Staphylococcus aureus	80	3	1	0	0	8513	0	na	1,00
Staphylococcus aureus	65	4	1	0	1	8513	0	na	1,00
Staphylococcus aureus	50	10	1	0	1	8513	0	na	1,00
Staphylococcus aureus	35	16	3	0	3	8511	0	na	1,00
‘Hits’ - shows the number of hits to different clusters and single plasmids
‘p-value signif.’ - shows the number of plasmids which had p-value lower (plasmids in a cluster which had most unique k-mers found and single plasmids).
‘TP’ - a true positive hit. In a cluster, a plasmid with highest total k-mers is considered as a hit, all the other plasmids are occur in the cluster solely due to high amount of shared k-mers.
*k-mer length was 20 (k=20) and clustering threshold was 80% in all tests. Staphylococcus aureus and Burkholderia cenocepacia are negative controls
